# Supplementary material for: Is there enough evidence to use botulinum toxin injections for bruxism management? A systematic literature review
Source: Springer Nature journal article supplement (doi:10.1007/s00784-017-2092-4), 2017-03-02
Supplement: MOESM1 [file 12110756]

**List of articles excluded after reading full text**

1. Sevim S, Kaleağası H, Fidancı H (2015) Sleep bruxism possibly triggered by multiple sclerosis attacks and treated successfully with botulinum toxin: Report of three cases. Mult Scler Relat Disord 4(5):403-5.
2. Kesikburun S, Alaca R, Aras B, Tuğcu I, Tan AK (2014) Botulinum toxin injection for bruxism associated with brain injury: case report. J Rehabil Res Dev 51(4):661-4.
3. Nash MC, Ferrell RB, Lombardo MA, Williams RB (2004) Treatment of bruxism in Huntington's disease with botulinum toxin. J Neuropsychiatry Clin Neurosci 16(3):381-2.
4. See SJ, Tan EK. Severe amphethamine-induced bruxism: treatment with botulinum toxin (2003) Acta Neurol Scand 107(2):161-3.
5. Finiels PJ, Batifol D (2014) The use of botulinum toxin in the treatment of the consequences of bruxism on cervical spine musculature. Toxicon 80:58-63.
6. Santamato A, Panza F, Di Venere D, Solfrizzi V, Frisardi V, Ranieri M, Fiore P (2010) Effectiveness of botulinum toxin type A treatment of neck pain related to nocturnal bruxism: a case report. J Chiropr Med 9(3):132-7.
7. El Maaytah M, Jerjes W, Upile T, Swinson B, Hopper C, Ayliffe P (2006) Bruxism secondary to brain injury treated with botulinum toxin-A: a case report. Head Face Med 23;2:41.
8. Monroy PG, da Fonseca MA (2006) The use of botulinum toxin-a in the treatment of severe bruxism in a patient with autism: a case report. Spec Care Dentist 26(1):37-9.
9. Pidcock FS, Wise JM, Christensen JR (2002) Treatment of severe post-traumatic bruxism with botulinum toxin-A: case report. J Oral Maxillofac Surg 60(1):115-7.
10. Tan EK, Jankovic J (2000) Treating severe bruxism with botulinum toxin. J Am Dent Assoc 131(2):211-6.
11. Ivanhoe CB, Lai JM, Francisco GE (1997) Bruxism after brain injury: successful treatment with botulinum toxin-A. Arch Phys Med Rehabil 78(11):1272-3.
